# Supplementary material for: Negative regulation of NF-κB signaling in T lymphocytes by the ubiquitin-specific protease USP34
Source: PubMed Central journal article supplement (PMC3649923; doi:10.1186/1478-811x-11-25), 2013-04-16
Supplement: 1478-811X-11-25-S2.pdf [file 1478-811X-11-25-S2.pdf]

**Additional File 2: Design of the siRNA library**

| <b>Name</b>               | <b>RefSeq ID</b> | <b>siRNA ID or sense siRNA</b>                                                                                                                                                                                                                                              |
|---------------------------|------------------|-----------------------------------------------------------------------------------------------------------------------------------------------------------------------------------------------------------------------------------------------------------------------------|
| <b>BAP1</b>               | NM_004656        | SASI_Hs01_00105395<br>SASI_Hs01_00105396                                                                                                                                                                                                                                    |
| <b>UCH-L1</b>             | NM_004181        | SASI_Hs01_00178415<br>SASI_Hs01_00178416                                                                                                                                                                                                                                    |
| <b>UCH-L3</b>             | NM_006002        | SASI_Hs01_00200423<br>SASI_Hs01_00200424                                                                                                                                                                                                                                    |
| <b>UCH-L5, UCH37</b>      | NM_015984        | SASI_Hs01_00142742<br>SASI_Hs01_00142743                                                                                                                                                                                                                                    |
| <b>USP1</b>               | NM_001017415     | SASI_Hs01_00157121<br>SASI_Hs01_00157122                                                                                                                                                                                                                                    |
| <b>USP2</b>               | NM_171997        | SASI_Hs01_00174976<br>SASI_Hs02_00367754                                                                                                                                                                                                                                    |
| <b>USP3</b>               | NM_006537        | SASI_Hs01_00023593<br>SASI_Hs01_00023595                                                                                                                                                                                                                                    |
| <b>USP4, UNPH</b>         | NM_199443        | SASI_Hs01_00028215<br>SASI_Hs01_00028216                                                                                                                                                                                                                                    |
| <b>USP5</b>               | NM_003481        | SASI_Hs01_00184929<br>SASI_Hs01_00184930                                                                                                                                                                                                                                    |
| <b>USP6, TRE-2, TRE17</b> | NM_004505        | SASI_Hs02_00337765<br>SASI_Hs02_00337766                                                                                                                                                                                                                                    |
| <b>USP7, HAUSP</b>        | NM_003470        | SASI_Hs01_00079539<br>SASI_Hs01_00079540                                                                                                                                                                                                                                    |
| <b>USP8, UBPY</b>         | NM_005154        | SASI_Hs02_00339089<br>SASI_Hs01_00136039                                                                                                                                                                                                                                    |
| <b>USP9X, FAF-X</b>       | NM_001039590     | SASI_Hs01_00031439<br>SASI_Hs02_00308597                                                                                                                                                                                                                                    |
| <b>USP9Y, FAF-Y</b>       | NM_004654        | SASI_Hs01_00081909<br>SASI_Hs02_00338066                                                                                                                                                                                                                                    |
| <b>USP10</b>              | NM_005153        | SASI_Hs01_00213007<br>SASI_Hs01_00213008                                                                                                                                                                                                                                    |
| <b>USP11</b>              | NM_004651        | SASI_Hs01_00148685<br>SASI_Hs01_00148686                                                                                                                                                                                                                                    |
| <b>USP12, UBH1</b>        | NM_182488        | SASI_Hs01_00167303<br>SASI_Hs01_00167305                                                                                                                                                                                                                                    |
| <b>USP13, ISOT-3</b>      | NM_003940        | SASI_Hs01_00108438<br>SASI_Hs01_00108439                                                                                                                                                                                                                                    |
| <b>USP14, ISOT</b>        | NM_005151        | SASI_Hs01_00016087<br>SASI_Hs01_00016089                                                                                                                                                                                                                                    |
| <b>USP15</b>              | NM_006313        | SASI_Hs01_00059894<br>SASI_Hs01_00059895                                                                                                                                                                                                                                    |
| <b>USP16, UBPM</b>        | NM_001001992     | SASI_Hs01_00121496<br>SASI_Hs02_00341586                                                                                                                                                                                                                                    |
| <b>USP17L3</b>            | XM_001720764 1 s | CACGUUAACUUUACACACUdTdT<br>CUAUCAUUGCGGUCUUUGUdTdT<br>GCAAUAUCCUGAGUGCCUUdTdT<br>GUUGUCACGACGGACAUAUdTdT<br>GCAACAAACUUGCCAAGAAAdTdT<br>GGAAGAUGUCCAUGAAUUUdTdT<br>GACAUUACUUCUCUUAUGUdTdT<br>CUCAAGAAGGCCAGUGGUAdTdT<br>CACCUUAGACCACUGGAAAdTdT<br>GAGAUUCUCCGAUGUCGCAdTdT |
| <b>USP18, UBP43</b>       | NM_017414        | SASI_Hs01_00221412                                                                                                                                                                                                                                                          |

|                     |              |                                          |
|---------------------|--------------|------------------------------------------|
|                     |              | SASI_Hs01_00221413                       |
| <b>USP19</b>        | NM_006677    | SASI_Hs01_00130241<br>SASI_Hs01_00130242 |
| <b>USP20, VDU1</b>  | NM_001008563 | SASI_Hs01_00099343<br>SASI_Hs01_00099344 |
| <b>USP21, USP23</b> | NM_001014443 | SASI_Hs01_00177787<br>SASI_Hs01_00177788 |
| <b>USP22</b>        | XM_042698    | SASI_Hs01_00276309<br>SASI_Hs01_00276310 |
| <b>USP24</b>        | XM_934749    | SASI_Hs01_00301651<br>SASI_Hs01_00301652 |
| <b>USP25</b>        | NM_013396    | SASI_Hs02_00344762<br>SASI_Hs01_00191397 |
| <b>USP26</b>        | NM_031907    | SASI_Hs01_00043149<br>SASI_Hs01_00043150 |
| <b>USP28</b>        | NM_020886    | SASI_Hs01_00077918<br>SASI_Hs01_00077919 |
| <b>USP29</b>        | NM_020903    | SASI_Hs01_00032719<br>SASI_Hs01_00032720 |
| <b>USP30</b>        | NM_032663    | SASI_Hs01_00155679<br>SASI_Hs01_00155680 |
| <b>USP31</b>        | NM_020718    | SASI_Hs01_00020641<br>SASI_Hs01_00020642 |
| <b>USP32</b>        | NM_032582    | SASI_Hs01_00086230<br>SASI_Hs01_00086231 |
| <b>USP33, VDU2</b>  | NM_201626    | SASI_Hs01_00142382<br>SASI_Hs01_00142383 |
| <b>USP34</b>        | NM_014709    | SASI_Hs01_00089169<br>SASI_Hs02_00346129 |
| <b>USP35</b>        | XM_935137    | SASI_Hs01_00291572<br>SASI_Hs01_00291573 |
| <b>USP36</b>        | NM_025090    | SASI_Hs02_00357787<br>SASI_Hs01_00194136 |
| <b>USP37</b>        | NM_020935    | SASI_Hs01_00018875<br>SASI_Hs02_00354323 |
| <b>USP38</b>        | NM_032557    | SASI_Hs01_00189218<br>SASI_Hs02_00360065 |
| <b>USP39, SAD1</b>  | NM_006590    | SASI_Hs01_00034674<br>SASI_Hs01_00034675 |
| <b>USP40</b>        | NM_018218    | SASI_Hs01_00145783<br>SASI_Hs02_00351527 |
| <b>USP41</b>        | XM_036729    | SASI_Hs02_00482814<br>SASI_Hs02_00482815 |
| <b>USP42</b>        | XM_932196    | SASI_Hs01_00248233<br>SASI_Hs01_00248234 |
| <b>USP43</b>        | XM_934221    | SASI_Hs01_00274671<br>SASI_Hs01_00274672 |
| <b>USP44</b>        | NM_032147    | SASI_Hs02_00359381<br>SASI_Hs01_00075742 |
| <b>USP45</b>        | XM_931124    | SASI_Hs01_00265784<br>SASI_Hs01_00265785 |
| <b>USP46</b>        | NM_022832    | SASI_Hs01_00080807<br>SASI_Hs01_00080808 |
| <b>USP47</b>        | NM_017944    | SASI_Hs01_00112225<br>SASI_Hs01_00112227 |
| <b>USP48</b>        | NM_032236    | SASI_Hs01_00077498<br>SASI_Hs01_00077499 |
| <b>USP49</b>        | NM_018561    | SASI_Hs01_00055585                       |

|                                |              |                                          |
|--------------------------------|--------------|------------------------------------------|
|                                |              | SASI_Hs02_00352112                       |
| <b>USP50</b>                   | NM_203494    | SASI_Hs02_00373416<br>SASI_Hs02_00373417 |
| <b>USP51</b>                   | NM_201286    | SASI_Hs02_00372924<br>SASI_Hs02_00372925 |
| <b>USP52</b>                   | NM_014871    | SASI_Hs01_00133440<br>SASI_Hs01_00133442 |
| <b>USP54</b>                   | NM_152586    | SASI_Hs02_00366408<br>SASI_Hs02_00366409 |
| <b>USPL1</b>                   | NM_005800    | SASI_Hs02_00340306<br>SASI_Hs01_00128479 |
| <b>CYLD</b>                    | NM_015247    | SASI_Hs01_00177192<br>SASI_Hs01_00177191 |
| <b>DUB-3</b>                   | NM_201402    | SASI_Hs02_00372940<br>SASI_Hs02_00372941 |
| <b>Ataxin-3</b>                | NM_030660    | SASI_Hs02_00358236<br>SASI_Hs02_00358237 |
| <b>Ataxin-3-like</b>           | XM_045705    | SASI_Hs01_00259290<br>SASI_Hs01_00259291 |
| <b>Josephin-1</b>              | NM_014876    | SASI_Hs02_00346483<br>SASI_Hs01_00072064 |
| <b>Josephin-2</b>              | NM_138334    | SASI_Hs01_00128488<br>SASI_Hs01_00128489 |
| <b>TAF1D</b>                   | NM_024116    | SASI_Hs01_00119698<br>SASI_Hs01_00119700 |
| <b>TNFAIP3, A20</b>            | NM_006290    | SASI_Hs01_00033556<br>SASI_Hs01_00033557 |
| <b>ZA20D1, Cezanne-1</b>       | NM_020205    | SASI_Hs01_00089029<br>SASI_Hs01_00089030 |
| <b>OTUD7i, Cezanne-2</b>       | NM_130901    | SASI_Hs01_00055782<br>SASI_Hs01_00055783 |
| <b>OTUD4, HIN-1</b>            | NM_017493    | SASI_Hs02_00372731<br>SASI_Hs02_00372732 |
| <b>OTUD6A, HIN-6</b>           | NM_207320    | SASI_Hs01_00018704<br>SASI_Hs01_00018705 |
| <b>OTUD2, YOD1</b>             | NM_018566    | SASI_Hs01_00052848<br>SASI_Hs01_00052849 |
| <b>OTUD6B</b>                  | NM_016023    | SASI_Hs01_00222466<br>SASI_Hs02_00348712 |
| <b>OTUD5</b>                   | NM_017602    | SASI_Hs01_00052828<br>SASI_Hs01_00052829 |
| <b>OTUB1, Otubain-1</b>        | NM_017670    | SASI_Hs02_00378146<br>SASI_Hs02_00378147 |
| <b>OTUB2, Otubain-2</b>        | NM_023112    | SASI_Hs01_00010701<br>SASI_Hs01_00010702 |
| <b>OTUD1</b>                   | XR_040065    | SASI_Hs02_00515603<br>SASI_Hs02_00515604 |
| <b>ZRANB1, TRABID</b>          | NM_017580    | SASI_Hs01_00155779<br>SASI_Hs02_00350242 |
| <b>VCPIP1, VCIP135</b>         | NM_025054    | SASI_Hs02_00357704<br>SASI_Hs01_00165636 |
| <b>STAMPB, AMSH</b>            | NM_006463    | SASI_Hs01_00051759<br>SASI_Hs01_00051760 |
| <b>STAMBPL1, AMSH-like</b>     | NM_020799    | SASI_Hs01_00241436<br>SASI_Hs01_00241437 |
| <b>BRCC3i, BRCC36, BRCC3</b>   | NM_001018055 | SASI_Hs02_00356685<br>SASI_Hs01_00193368 |
| <b>COPS5, CSN5, JAB1, SGN5</b> | NM_006837    | SASI_Hs02_00342404                       |

|                            |              |                                                                                                                                                                                                                                                                           |
|----------------------------|--------------|---------------------------------------------------------------------------------------------------------------------------------------------------------------------------------------------------------------------------------------------------------------------------|
|                            |              | SASI_Hs01_00209042                                                                                                                                                                                                                                                        |
| <b>COPS6, CSN6, SGN6</b>   | NM_006833    | SASI_Hs02_00342398<br>SASI_Hs01_00117938                                                                                                                                                                                                                                  |
| <b>EIF3S3, eIF-3-gamma</b> | NM_003756    | SASI_Hs01_00072290<br>SASI_Hs01_00072291                                                                                                                                                                                                                                  |
| <b>EIF3S5, eIF-epsilon</b> | NM_003754    | SASI_Hs01_00246686<br>SASI_Hs02_00336223                                                                                                                                                                                                                                  |
| <b>MYSM1</b>               | XM_055481    | SASI_Hs01_00255872<br>SASI_Hs01_00255873                                                                                                                                                                                                                                  |
| <b>MPND</b>                | NM_032868    | SASI_Hs01_00162447<br>SASI_Hs01_00162448                                                                                                                                                                                                                                  |
| <b>PSMD14, POH1, RPN11</b> | NM_005805    | SASI_Hs02_00340316<br>SASI_Hs01_00024446                                                                                                                                                                                                                                  |
| <b>PRPF8, PRP8</b>         | NM_006445    | SASI_Hs01_00015918<br>SASI_Hs01_00015919                                                                                                                                                                                                                                  |
| <b>PSMD7, RPN8</b>         | NM_002811    | SASI_Hs02_00334491<br>SASI_Hs02_00334492                                                                                                                                                                                                                                  |
| <b>USP17L5</b>             | XM_001130437 | SASI_Hs02_00387302<br>SASI_Hs02_00387303                                                                                                                                                                                                                                  |
| <b>USP17L1P</b>            | XR_040280    | SASI_Hs02_00517496<br>SASI_Hs02_00517497                                                                                                                                                                                                                                  |
| <b>IFP38</b>               | NG_005632 s  | CCGAUGACUUUGAGACCAUdTdT                                                                                                                                                                                                                                                   |
| <b>USP17L3</b>             | XM_001720764 | CACGUUAACUUUACACACUdTdT<br>CUAUCAUUGCGGUCUUUGUdTdT<br>GCAAUAUCCUGAGUGCCUdTdT<br>GUUGUCACGACGGACAUAUdTdT<br>GCAACAAACUUGCCAAGAAdTdT<br>GGAAGAUGUCCAUGAAUUUdTdT<br>GACAUUACUUCUCUUAUGUdTdT<br>CUCAAGAAGGCCAGUGGUAdTdT<br>CACCUUAGACCACUGGAAAdTdT<br>GAGAUUCUCCGAUGUCGCAdTdT |
| <b>USP17L4</b>             | XM_001720370 | CACGUUAACUUUACACACUdTdT<br>CUAUCAUUGCGGUCUUUGUdTdT<br>GCAAUAUCCUGAGUGCCUdTdT<br>GUUGUCACGACGGAUUAUdTdT<br>GCAACAAACUUGCCAAGAAdTdT<br>CACCUUAGACCACUGGAAAdTdT<br>GGAAGAUGUCCAUGAAUUUdTdT<br>CUCAAGAAGGCCAGUGGUAdTdT<br>GAGAUUCUCCGAUGUCGCAdTdT<br>CGGAUUAUACUUCUCUUAUdTdT  |
| <b>USP17L6</b>             | NR_027279    | CUGGACAUCGCCUGGAUAdTdT<br>CCAAGGUCCUCAUCCUUGUdTdT<br>GAGAUUCUCCGAUGUCACAdTdT<br>GCCUAUCAUUGUGGUGUUUdTdT<br>GCUUCCUUGCAGUGCCUGAdTdT<br>GGAAGAUGCCCAUGAAUUUdTdT                                                                                                             |
| <b>USP17L7</b>             | XM_001723172 | GAGAUUCUCCGAUGUCACAdTdT<br>GCGUAUUGGAGAUCUCAAAdTdT<br>CACCUUAGACCACUGGAAAdTdT<br>CUCUCAACGUGUCAUCUdTdT<br>CUCAUUCUUGUAUUGAAGAdTdT<br>CCAAAGAACUCAUUGGAGAdTdT<br>GACGUUAACUUUACCCACUdTdT<br>CAUGAAUUUCUCAUGUUUAdTdT<br>CAUGUUCUGUACUAUGCAAdTdT<br>CUCAAGAAGGCCAGUGGUAdTdT  |

|                |              |                                                                                                                                                              |
|----------------|--------------|--------------------------------------------------------------------------------------------------------------------------------------------------------------|
| <b>USP17L8</b> | XM_001720762 | GAGAUUCUGCGAUGUCACAdTdT<br>GUUGUCACAACGGAUUUAdTdT<br>CUAUCCUUGCGGUCUUUGUdTdT                                                                                 |
| <b>DUSP19</b>  | AB038770     | GAAUUUAUUGAAGAAGCAAdTdT<br>GUUGCAUAUGGAGUUGAAAdTdT<br>CCAACAUCCUGUCUUUUUdTdT<br>GACUUUACAUAUAAGAGCAAdTdT<br>GCUUCCUCAGUGACUUUAdTdT<br>GACUCAUAUUCUUAUGUUdTdT |
